# Supplementary material for: Microscopic Hematuria at Kidney Donor Screening and Post-Donation Kidney Outcomes
Source: MDPI journal article supplement (doi:10.3390/jcm11216281), 2022-10-25
Supplement: s1 [file s1]

| <b>Table of content Supporting Information</b>                                                                                                                                                                 |             |
|----------------------------------------------------------------------------------------------------------------------------------------------------------------------------------------------------------------|-------------|
| <i>Title</i>                                                                                                                                                                                                   | <i>Page</i> |
| Supplementary Methods                                                                                                                                                                                          | S2          |
| Table S1. Description of donors who were declined from donation due to hematuria.                                                                                                                              | S4          |
| Table S2. Causes of kidney failure in recipients who were relatives of donors with pre-donation hematuria.                                                                                                     | S5          |
| Table S3. Baseline characteristics of the donors with pre-donation microscopic hematuria                                                                                                                       | S6          |
| Table S4. Long-term follow-up data outcomes                                                                                                                                                                    | S7          |
| Table S5. Long-term follow-up data antihypertensive medication use                                                                                                                                             | S8          |
| Table S6. Linear mixed model analysis for the association between pre-donation hematuria ( $\geq 2$ RBC per high powerfield or $\geq 6$ RBC per $\mu\text{L}$ ) and post-donation PCR, eGFR and SBP over time  | S9          |
| Table S7. Linear mixed model analysis for the association between pre-donation hematuria ( $\geq 3$ RBC per high powerfield or $\geq 15$ RBC per $\mu\text{L}$ ) and post-donation PCR, eGFR and SBP over time | S10         |
| Table S8. Baseline characteristics of the living kidney donor population according to presence of risk factors                                                                                                 | S11         |
| Figure S1. Distribution of pre-donation PCR in the hematuria group and the non-hematuria group.                                                                                                                | S12         |
| Supplementary Results                                                                                                                                                                                          | S13         |
| Figure S2. Latent class growth model of post-donation PCR course.                                                                                                                                              | S14         |
| Figure S3. Latent class growth model of post-donation eGFR course.                                                                                                                                             | S15         |
| Figure S4. Latent class growth model of post-donation SBP course.                                                                                                                                              | S16         |

## Supplementary methods

### *Latent class growth analysis*

SBP, eGFR, and PCR were log-transformed to obtain normally distributed outcome variables. Outliers, defined as values deviating more than four standard deviation from the mean, were removed from the dataset.

We used latent class growth modelling aiming to identify a subgroup of patients with a worse progression over time compared to the rest of them. For this purpose the 'hlme' (heterogeneous linear mixed model) function from the R-package 'lcmm' was used. All models included global and class-specific fixed intercepts and linear and quadratic effects of follow-up time as well as covariates confounders age at donation and gender. The outcome variable were log-transformed eGFR, PCR, and SBP. In addition, four different models were compared: 1) no individual random intercepts, linear or quadratic effects of follow-up time; 2) individual random intercepts, but no linear or quadratic effects of follow-up time; 3) individual random intercepts and linear effects of follow-up time, but no quadratic effects; and 4) individual random intercepts and linear and quadratic effects of follow-up time. Analyses were performed with automated grid searches to run the analyses with ten different starting values to avoid local maxima. For each model the optimal number of classes was determined by the analysis showing the lowest Bayesian Information Criterion (BIC). The best-fitting overall model was regarded the one among the four with the lowest BIC.

| <b>Table S1. Description of donors who were declined from donation due to hematuria.</b>            |                                                                                                                                                                                                                                               |                                                          |                                                                                                                                  |
|-----------------------------------------------------------------------------------------------------|-----------------------------------------------------------------------------------------------------------------------------------------------------------------------------------------------------------------------------------------------|----------------------------------------------------------|----------------------------------------------------------------------------------------------------------------------------------|
| <b>Case number</b>                                                                                  | <b>Findings during donor screening</b>                                                                                                                                                                                                        | <b>Red blood cell count</b>                              | <b>Further evaluation/conclusions</b>                                                                                            |
| <i>Individuals in whom hematuria was the only reason for exclusion (suspected renal disease)</i>    |                                                                                                                                                                                                                                               |                                                          |                                                                                                                                  |
| 1                                                                                                   | Glomerular (50% dysmorphic red blood cells) microscopic hematuria on three separate measurements without reduced kidney function, proteinuria or hypertension.                                                                                | 8/ $\mu$ L, 8/ $\mu$ L and 22/ $\mu$ L                   | Exclusion from donation. No biopsy advised, follow-up hematuria at transplant center.                                            |
| 2                                                                                                   | Hypertension, proteinuria (2g/24h) and hematuria (291/ $\mu$ L). Unknown whether dysmorphic erythrocytes were present. Possibly renal disease.                                                                                                | 455/ $\mu$ L in spot urine and 291/ $\mu$ L in 24h urine | Exclusion from donation. No biopsy advised, follow-up hematuria at transplant center.                                            |
| 3                                                                                                   | Glomerular microscopic hematuria (90% dysmorphic red blood cells, no red cell casts).                                                                                                                                                         | No count documented                                      | Exclusion from donation. Follow-up genetic testing revealed a carrier status for Alport syndrome.                                |
| 4                                                                                                   | Glomerular microscopic hematuria (20-40% dysmorphic red blood cells, no cylindric cells). No causes were found at urological evaluation.                                                                                                      | 24/ $\mu$ L and 153/ $\mu$ L                             | Exclusion from donation. If continuing the donation procedure is desired, kidney biopsy is needed to exclude glomerular disease. |
| 5                                                                                                   | Microscopic hematuria twice during screening without proteinuria, hypertension or reduced kidney function. At urological evaluation, a potentially malignant lesion was seen in the right kidney.                                             | 20/ $\mu$ L and 34/ $\mu$ L                              | Exclusion from donation. Follow-up at urologist for lesion right kidney.                                                         |
| <i>Individuals in whom hematuria contributed to the decision of exclusion amongst other reasons</i> |                                                                                                                                                                                                                                               |                                                          |                                                                                                                                  |
| 6                                                                                                   | Low mGFR and erythrocytes in urinesediment. Urine sediment was not repeated during screening due to low mGFR (exclusion from donation anyway).                                                                                                | 24/ $\mu$ L                                              | Exclusion from donation. At follow-up by general practitioner, hematuria was no longer present.                                  |
| 7                                                                                                   | Possibly SLE and microscopic hematuria on two separate measurements without reduced kidney function, proteinuria or hypertension.                                                                                                             | 8/ $\mu$ L and 22/ $\mu$ L                               | Exclusion from donation. Follow-up hematuria at general practitioner was advised.                                                |
| 8                                                                                                   | Low mGFR and microscopic hematuria (for which urological evaluation had been performed years ago which revealed no urological causes). Besides, a lesion in adrenal glands was found on CT. Lastly unhealthy lifestyle (smoking and alcohol). | 4/ $\mu$ L and 5/ $\mu$ L                                | Exclusion from donation. Follow-up of lesion in adrenal glands was advised.                                                      |
| 9                                                                                                   | Microscopic hematuria at evaluation (>40% dysmorphic red blood cells). Besides, increased M-protein, alterations on ECG and high blood glucose levels were found.                                                                             | 14/ $\mu$ L and 30/ $\mu$ L                              | Exclusion from donation. Follow-up of the findings is advised in referral hospital.                                              |

**Table S2. Causes of kidney failure in recipients who were relatives of donors with pre-donation hematuria.**

| <i>Cause of kidney failure</i>                           | <i>N (%)</i> |
|----------------------------------------------------------|--------------|
| Focal segmental glomerulosclerosis                       | 4 (11%)      |
| Diabetic nephropathy                                     | 4 (11%)      |
| IgA nephropathy                                          | 4 (11%)      |
| Vesicoureteral reflux nephropathy                        | 4 (11%)      |
| Anatomical abnormalities limiting urine outflow*         | 4 (11%)      |
| Assumed consequence of hypertension                      | 4 (11%)      |
| Polycystic kidney disease                                | 3 (8%)       |
| Etiology unknown                                         | 2 (5%)       |
| Microscopic polyangiitis                                 | 1 (3%)       |
| Alport syndrome (mutation in COL4A5 gene, X-linked)      | 1 (3%)       |
| Prune belly syndrome                                     | 1 (3%)       |
| Kidney atrophy                                           | 1 (3%)       |
| Membranous glomerulopathy                                | 1 (3%)       |
| Interstitial nephritis caused by medication use          | 1 (3%)       |
| Nephrosclerosis caused by familial hypercholesterolaemia | 1 (3%)       |
| Good pasture syndrome                                    | 1 (3%)       |
| Granulomatosis with polyangiitis                         | 1 (3%)       |

\*In 1 case caused by Klinefelter syndrome

**Table S3. Baseline characteristics of the donors with pre-donation microscopic hematuria**

|                                           | <i>Total (n=88)</i> | <b>Microscopic hematuria</b>        |                                                            |
|-------------------------------------------|---------------------|-------------------------------------|------------------------------------------------------------|
|                                           |                     | <i>Twice before donation (n=68)</i> | <i>Once before donation and once after donation (n=20)</i> |
| Female sex, n [%]                         | 70 [80]             | 54 [79]                             | 16 [80]                                                    |
| Caucasian race, n [%]                     | 88 [100]            | 49 [100]                            | 29 [100]                                                   |
| Age, years                                | 54 (11)             | 54 (11)                             | 53 (10)                                                    |
| Weight, kg                                | 77 (13)             | 77 (13)                             | 78 (12)                                                    |
| Height, cm                                | 171 (9)             | 171 (9)                             | 172 (8)                                                    |
| BMI, kg/m <sup>2</sup>                    | 26 (3)              | 26 (3)                              | 26 (4)                                                     |
| BSA, m <sup>2</sup>                       | 1.89 (0.18)         | 1.89 (0.19)                         | 1.91 (0.16)                                                |
| SBP, mmHg                                 | 125 (11)            | 126 (11)                            | 122 (12)                                                   |
| DBP, mmHg                                 | 75 (9)              | 75 (9)                              | 73 (8)                                                     |
| Hypertension <sup>∞</sup> , n [%]         | 23 [26]             | 20 [29]                             | 3 [15]                                                     |
| Use of antihypertensive medication, n [%] | 5 [6]               | 4 [6]                               | 1 [5]                                                      |
| mGFR, ml/min                              | 111 (22)            | 110 (22)                            | 111 (21)                                                   |
| eGFR, ml/min/1.73m <sup>2</sup>           | 88 (14)             | 88 (15)                             | 86 (13)                                                    |
| Serum creatinine, µmol/l                  | 72 (11)             | 72 (12)                             | 73 (9)                                                     |
| Serum glucose, mmol/l                     | 5.3 (0.5)           | 5.3 (0.5)                           | 5.4 (0.4)                                                  |
| HbA1C, %                                  | 5.5 (0.3)           | 5.5 (0.3)                           | 5.6 (0.3)                                                  |
| Diabetes, n [%]                           | 1 [1]               | 1 [2]                               | 0 [0]                                                      |
| Serum cholesterol, mmol/l                 | 5.3 (1.0)           | 5.2 (0.9)                           | 5.6 (1.1)                                                  |
| LDL                                       | 3.4 (1.1)           | 3.3 (1.1)                           | 3.6 (1.5)                                                  |
| HDL                                       | 1.7 (0.5)           | 1.7 (0.5)                           | 1.9 (0.6)                                                  |
| Triglycerides                             | 1.2 (0.8)           | 1.2 (0.8)                           | 1.3 (0.6)                                                  |
| Serum urea, mmol/l                        | 5.3 (1.2)           | 5.3 (1.3)                           | 4.9 (1.1)                                                  |
| Serum potassium, mmol/l                   | 3.9 (0.3)           | 3.9 (0.3)                           | 4.0 (0.3) <sup>a</sup>                                     |
| Serum sodium, mmol/l                      | 141 (3)             | 141 (2)                             | 140 (3)                                                    |
| Sodium excretion, mmol/24h                | 172 (66)            | 174 (68)                            | 158 (56)                                                   |
| PCR, mg/mmol                              | 9 [0-15]            | 8 [0-15]                            | 11 [8-14]                                                  |

<sup>∞</sup>: SBP >140 mmHg and/or DBP >90 mmHg

<sup>a</sup>: P<0.05 vs. "twice before donation" group

Data are presented as mean (standard deviation) for normally distributed variables and as median [first quartile – third quartile] for non-normally distributed variables.

Abbreviations: BMI: body mass index; BSA: body surface area; SBP: systolic blood pressure; DBP: diastolic blood pressure; eGFR: estimated glomerular filtration rate.

| Table S4. Long-term follow-up data outcomes |                       |         |         |         |         |         |         |         |         |         |         |         |         |         |         |         |
|---------------------------------------------|-----------------------|---------|---------|---------|---------|---------|---------|---------|---------|---------|---------|---------|---------|---------|---------|---------|
|                                             | Moment after donation |         |         |         |         |         |         |         |         |         |         |         |         |         |         |         |
|                                             | 3 mo                  | 1y      | 2y      | 3y      | 4y      | 5y      | 6y      | 7y      | 8y      | 9y      | 10y     | 11y     | 12y     | 13y     | 14y     | 15y     |
| <b>PCR</b>                                  |                       |         |         |         |         |         |         |         |         |         |         |         |         |         |         |         |
| Total population                            |                       |         |         |         |         |         |         |         |         |         |         |         |         |         |         |         |
| Number                                      | 363                   | 363     | 317     | 279     | 248     | 208     | 144     | 141     | 120     | 94      | 76      | 73      | 39      | 42      | 27      | 10      |
| Median                                      | 14                    | 9       | 9       | 9       | 9       | 8       | 9       | 9       | 9       | 9       | 8       | 9       | 8       | 9       | 9       | 11      |
| IQR                                         | 0-30                  | 6-13    | 7-13    | 6-13    | 6-13    | 3-14    | 6-12    | 7-12    | 6-13    | 6-12    | 6-13    | 7-12    | 4-15    | 7-11    | 8-17    | 8-15    |
| Hematuria group                             |                       |         |         |         |         |         |         |         |         |         |         |         |         |         |         |         |
| Number                                      | 50                    | 58      | 45      | 37      | 31      | 18      | 9       | 11      | 8       | 6       | 7       | 6       | 3       | 3       | 4       | 2       |
| Median                                      | 11                    | 10      | 11      | 9       | 11      | 8       | 9       | 8       | 9       | 3       | 8       | 9       | 13      | 8       | 8       | -       |
| IQR                                         | 10-28                 | 8-13    | 6-14    | 6-13    | 7-17    | 4-14    | 7-13    | 6-11    | 2-16    | 0-14    | 0-24    | 7-16    | -       | -       | 2-9     | -       |
| Non-hematuria group                         |                       |         |         |         |         |         |         |         |         |         |         |         |         |         |         |         |
| Number                                      | 313                   | 305     | 272     | 242     | 217     | 190     | 135     | 130     | 112     | 88      | 69      | 67      | 36      | 39      | 23      | 8       |
| Median                                      | 14                    | 9       | 9       | 9       | 9       | 8       | 9       | 9       | 9       | 9       | 8       | 8       | 8       | 9       | 10      | 11      |
| IQR                                         | 0-31                  | 6-13    | 6-13    | 6-13    | 6-13    | 3-14    | 6-12    | 7-12    | 6-12    | 6-12    | 6-13    | 7-12    | 4-14    | 7-13    | 8-17    | 8-20    |
| <b>eGFR</b>                                 |                       |         |         |         |         |         |         |         |         |         |         |         |         |         |         |         |
| Total population                            |                       |         |         |         |         |         |         |         |         |         |         |         |         |         |         |         |
| Number                                      | 692                   | 597     | 488     | 425     | 360     | 332     | 214     | 180     | 140     | 107     | 103     | 83      | 59      | 53      | 30      | 12      |
| Mean (SD)                                   | 58 (12)               | 60 (13) | 61 (13) | 62 (13) | 62 (13) | 64 (13) | 64 (14) | 63 (13) | 64 (14) | 63 (13) | 64 (15) | 64 (13) | 63 (14) | 63 (14) | 64 (14) | 64 (14) |
| Hematuria group                             |                       |         |         |         |         |         |         |         |         |         |         |         |         |         |         |         |
| Number                                      | 88                    | 77      | 60      | 54      | 44      | 34      | 23      | 14      | 11      | 7       | 8       | 6       | 3       | 7       | 4       | 3       |
| Mean (SD)                                   | 57±13                 | 59±13   | 61±15   | 62±15   | 63±14   | 62±13   | 67±17   | 66±18   | 67±16   | 59±8    | 66±18   | 61±10   | -       | 61±17   | -       | -       |
| Non-hematuria group                         |                       |         |         |         |         |         |         |         |         |         |         |         |         |         |         |         |
| Number                                      | 604                   | 520     | 428     | 371     | 316     | 298     | 191     | 166     | 129     | 100     | 95      | 77      | 56      | 46      | 26      | 9       |
| Mean (SD)                                   | 58±12                 | 60±13   | 61±13   | 62±13   | 62±13   | 64±13   | 64±13   | 63±12   | 64±14   | 63±13   | 63±14   | 65±13   | 64±14   | 63±14   | 64±14   | 66±15   |
| <b>SBP</b>                                  |                       |         |         |         |         |         |         |         |         |         |         |         |         |         |         |         |
| Total population                            |                       |         |         |         |         |         |         |         |         |         |         |         |         |         |         |         |
| Number                                      | 687                   | 557     | 458     | 390     | 330     | 321     | 199     | 165     | 134     | 104     | 97      | 82      | 57      | 51      | 30      | 14      |
| Mean (SD)                                   | 124±13                | 128±14  | 130±15  | 129±14  | 129±14  | 128±13  | 131±16  | 132±17  | 131±17  | 135±16  | 133±15  | 135±19  | 132±16  | 134±14  | 134±14  | 132±15  |
| Hematuria group                             |                       |         |         |         |         |         |         |         |         |         |         |         |         |         |         |         |
| Number                                      | 86                    | 77      | 56      | 51      | 44      | 33      | 19      | 15      | 10      | 7       | 6       | 6       | 3       | 6       | 4       | 3       |
| Mean (SD)                                   | 125±14                | 130±14  | 132±15  | 128±13  | 131±14  | 129±12  | 127±18  | 132±13  | 126±18  | 134±10  | 132±21  | 127±15  | -       | 135±17  | -       | -       |
| Non-hematuria group                         |                       |         |         |         |         |         |         |         |         |         |         |         |         |         |         |         |
| Number                                      | 601                   | 480     | 402     | 339     | 286     | 288     | 180     | 150     | 124     | 97      | 91      | 76      | 54      | 45      | 26      | 11      |
| Mean (SD)                                   | 124±13                | 128±14  | 129±14  | 129±14  | 129±15  | 128±13  | 31±16   | 132±18  | 132±17  | 135±16  | 133±14  | 135±19  | 132±16  | 134±14  | 135±15  | 136±17  |

| Table S5. Long-term follow-up data antihypertensive medication (AH med) use |                       |         |         |         |         |         |         |         |         |         |         |         |         |        |        |
|-----------------------------------------------------------------------------|-----------------------|---------|---------|---------|---------|---------|---------|---------|---------|---------|---------|---------|---------|--------|--------|
|                                                                             | Moment after donation |         |         |         |         |         |         |         |         |         |         |         |         |        |        |
|                                                                             | 1y                    | 2y      | 3y      | 4y      | 5y      | 6y      | 7y      | 8y      | 9y      | 10y     | 11y     | 12y     | 13y     | 14y    | 15y    |
| <b>Antihypertensive medication use</b>                                      |                       |         |         |         |         |         |         |         |         |         |         |         |         |        |        |
| Total population                                                            |                       |         |         |         |         |         |         |         |         |         |         |         |         |        |        |
| N donors                                                                    | 605                   | 496     | 433     | 363     | 336     | 218     | 181     | 143     | 108     | 103     | 84      | 59      | 53      | 30     | 14     |
| N (%) AH med use                                                            | 47 (8)                | 55 (11) | 50 (12) | 45 (12) | 41 (12) | 32 (15) | 28 (15) | 26 (18) | 24 (22) | 18 (17) | 16 (19) | 14 (24) | 16 (30) | 9 (30) | 5 (36) |
| Hematuria group                                                             |                       |         |         |         |         |         |         |         |         |         |         |         |         |        |        |
| N donors                                                                    | 78                    | 61      | 55      | 45      | 34      | 24      | 15      | 11      | 7       | 8       | 6       | 2       | 7       | 4      | 3      |
| N (%) AH med use                                                            | 5 (6)                 | 5 (8)   | 7 (13)  | 6 (13)  | 6 (18)  | 3 (13)  | 2 (13)  | 2 (18)  | 1 (14)  | 1 (13)  | 0 (0)   | 1 (50)  | 2 (29)  | 1 (25) | 1 (33) |
| Non hematuria group                                                         |                       |         |         |         |         |         |         |         |         |         |         |         |         |        |        |
| N donors                                                                    | 527                   | 435     | 378     | 318     | 302     | 194     | 166     | 132     | 101     | 95      | 78      | 56      | 46      | 26     | 11     |
| N (%) AH med use                                                            | 42 (8)                | 50 (11) | 43 (11) | 39 (12) | 35 (12) | 29 (15) | 26 (16) | 24 (18) | 23 (23) | 17 (18) | 16 (21) | 13 (23) | 14 (30) | 8 (31) | 4 (36) |

**Table S6. Linear mixed model analysis for the association between pre-donation hematuria ( $\geq 2$  RBC per high powerfield or  $\geq 6$  RBC per  $\mu\text{L}$ ) and post-donation PCR, eGFR and SBP over time**

|                        | Outcome PCR |               |        | Outcome eGFR |               |        | Outcome SBP |               |        |
|------------------------|-------------|---------------|--------|--------------|---------------|--------|-------------|---------------|--------|
|                        | Estimate    | 95% CI        | P      | Estimate     | 95% CI        | P      | Estimate    | 95% CI        | P      |
| Hematuria <sup>a</sup> | 0.13        | -0.16 to 0.41 | 0.38   | -1.28        | -3.79 to 1.23 | 0.32   | 1.80        | -0.93 to 4.52 | 0.20   |
| Time                   | 0.04        | 0.03 to 0.05  | <0.001 | 0.34         | 0.24 to 0.45  | <0.001 | 0.95        | 0.79 to 1.11  | <0.001 |
| Hematuria*time         | 0.02        | -0.06 to 0.10 | 0.50   | 0.02         | -0.51 to 0.54 | 0.95   | 0.67        | -0.13 to 1.46 | 0.10   |

<sup>a</sup>Donors with pre-donation hematuria were defined as 1, donors with no pre-donation hematuria were defined as 0.

Both models were adjusted for pre-donation age, sex, BMI, eGFR, PCR, SBP and antihypertensive medication use.

N total = 701

N hematuria group = 68

N non-hematuria group = 633

Abbreviations: PCR: protein/creatinine-ratio; eGFR: estimated glomerular filtration rate; BMI: body mass index; SBP: systolic blood pressure.



**Table S7. Linear mixed model analysis for the association between pre-donation hematuria ( $\geq 3$  RBC per high powerfield or  $\geq 15$  RBC per  $\mu\text{L}$ ) and post-donation PCR, eGFR and SBP over time**

|                        | Outcome PCR |               |        | Outcome eGFR |               |        | Outcome SBP |               |        |
|------------------------|-------------|---------------|--------|--------------|---------------|--------|-------------|---------------|--------|
|                        | Estimate    | 95% CI        | P      | Estimate     | 95% CI        | P      | Estimate    | 95% CI        | P      |
| Hematuria <sup>a</sup> | -0.04       | -0.40 to 0.32 | 0.84   | -1.38        | -4.33 to 1.57 | 0.36   | 1.17        | -2.03 to 4.36 | 0.47   |
| Time                   | 0.04        | 0.03 to 0.05  | <0.001 | 0.34         | 0.24 to 0.44  | <0.001 | 0.96        | 0.80 to 1.12  | <0.001 |
| Hematuria*time         | 0.08        | -0.04 to 0.20 | 0.19   | 0.15         | -0.54 to 0.84 | 0.68   | 0.52        | -0.49 to 1.54 | 0.31   |

<sup>a</sup>Donors with pre-donation hematuria were defined as 1, donors with no pre-donation hematuria were defined as 0.

Both models were adjusted for pre-donation age, sex, BMI, eGFR, PCR, SBP and antihypertensive medication use.

N total = 701

N hematuria group = 46

N non-hematuria group = 655

Abbreviations: PCR: protein/creatinine-ratio; eGFR: estimated glomerular filtration rate; BMI: body mass index; SBP: systolic blood pressure.

**Table S8. Linear mixed model analysis for the association between pre-donation hematuria and post-donation PCR, eGFR and SBP over time in a subgroup of donors with hematuria measured twice before donation**

|                        | Outcome PCR |               |        | Outcome eGFR |                |        | Outcome SBP |               |        |
|------------------------|-------------|---------------|--------|--------------|----------------|--------|-------------|---------------|--------|
|                        | Estimate    | 95% CI        | P      | Estimate     | 95% CI         | P      | Estimate    | 95% CI        | P      |
| Hematuria <sup>a</sup> | 0.22        | 0.11 to 1.73  | 0.10   | -1.26        | -3.71 to 1.18  | 0.31   | 2.05        | -0.58 to 4.68 | 0.13   |
| Time                   | 0.04        | 0.03 to 0.05  | <0.001 | 0.33         | -0.23 to -0.44 | <0.001 | 0.95        | -0.62 to 0.79 | <0.001 |
| Hematuria*time         | -0.01       | -0.07 to 0.04 | 0.63   | 0.22         | -0.26 to 0.70  | 0.38   | 0.09        | -0.62 to 0.79 | 0.81   |

<sup>a</sup>Donors with pre-donation hematuria were defined as 1, donors with no pre-donation hematuria were defined as 0.

Both models were adjusted for pre-donation age, sex, BMI, eGFR, PCR, SBP and antihypertensive medication use.

N total = 681

N hematuria group = 68

N non-hematuria group = 613

Abbreviations: PCR: protein/creatinine-ratio; eGFR: estimated glomerular filtration rate; BMI: body mass index; SBP: systolic blood pressure.

**Table S9. Baseline characteristics of the living kidney donor population according to presence of risk factors**

|                                           | Total population (n=701)  |                          | High risk subgroup* (n=306) |                          |
|-------------------------------------------|---------------------------|--------------------------|-----------------------------|--------------------------|
|                                           | Risk factors*             |                          | Microscopic hematuria       |                          |
|                                           | <i>Present</i><br>(n=306) | <i>Absent</i><br>(n=395) | <i>Present</i><br>(n=41)    | <i>Absent</i><br>(n=265) |
| Female sex, n [%]                         | 152 [50]                  | 193 [49]                 | 34 [83]                     | 118 [44] <sup>b</sup>    |
| Caucasian race, n [%]                     | 306 [100]                 | 395 [100]                | 41 [100]                    | 265 [100]                |
| Age, years                                | 55 (10)                   | 50 (11) <sup>b</sup>     | 56 (10)                     | 54 (10)                  |
| Weight, kg                                | 85 (15)                   | 77 (12) <sup>b</sup>     | 79 (14)                     | 85 (15) <sup>a</sup>     |
| Height, cm                                | 175 (10)                  | 176 (9)                  | 169 (9)                     | 175 (10) <sup>b</sup>    |
| BMI, kg/m <sup>2</sup>                    | 28 (4)                    | 25 (3) <sup>b</sup>      | 28 (3)                      | 28 (4)                   |
| BSA, m <sup>2</sup>                       | 1.99 (0.21)               | 1.93 (0.18) <sup>b</sup> | 1.90 (0.20)                 | 2.01 (0.21) <sup>a</sup> |
| SBP, mmHg                                 | 131 (15)                  | 123 (10) <sup>b</sup>    | 126 (14)                    | 132 (15) <sup>a</sup>    |
| DBP, mmHg                                 | 78 (9)                    | 74 (8) <sup>b</sup>      | 74 (10)                     | 78 (9) <sup>a</sup>      |
| Hypertension <sup>∞</sup> , n [%]         | 170 [56]                  | 13 [3]                   | 21 [51]                     | 149 [56]                 |
| Use of antihypertensive medication, n [%] | 51 [17]                   | 0 [0]                    | 5 [12]                      | 46 [17]                  |
| mGFR, ml/min                              | 115 (22)                  | 115 (23)                 | 108 (22)                    | 116 (22) <sup>a</sup>    |
| eGFR, ml/min/1.73m <sup>2</sup>           | 87 (13)                   | 90 (14) <sup>a</sup>     | 86 (13)                     | 87 (14)                  |
| Serum creatinine, µmol/l                  | 141 (2)                   | 78 (13)                  | 72 (12)                     | 79 (14) <sup>a</sup>     |
| Serum glucose, mmol/l                     | 5.4 (0.7)                 | 5.2 (0.5) <sup>b</sup>   | 5.4 (0.6)                   | 5.4 (0.7)                |
| HbA1C, %                                  | 5.5 (0.4)                 | 5.5 (0.3) <sup>a</sup>   | 5.5 (0.3)                   | 5.5 (0.4)                |
| Diabetes, n [%]                           | 6 [2]                     | 0 [0]                    | 1 [2]                       | 5 [2]                    |
| Serum cholesterol, mmol/l                 | 5.4 (1.0)                 | 5.3 (1.1)                | 5.4 (0.9)                   | 5.4 (1.0)                |
| LDL                                       | 3.4 (0.9)                 | 3.6 (0.9)                | 3.0 (1.0)                   | 3.4 (0.9)                |
| HDL                                       | 1.6 (0.6)                 | 1.6 (0.4)                | 1.8 (0.6)                   | 1.5 (0.6)                |
| Triglycerides                             | 1.5 (0.9)                 | 1.3 (0.9) <sup>a</sup>   | 1.3 (0.6)                   | 1.5 (0.9)                |
| Serum urea, mmol/l                        | 5.5 (1.3)                 | 5.4 (1.3)                | 5.3 (1.2)                   | 5.5 (1.4)                |
| Serum potassium, mmol/l                   | 3.9 (0.3)                 | 3.9 (0.3)                | 3.9 (0.3)                   | 3.9 (0.3)                |
| Serum sodium, mmol/l                      | 141 (2)                   | 141 (3)                  | 141 (2)                     | 141 (2)                  |
| Sodium excretion, mmol/24h                | 191 (72)                  | 199 (73)                 | 155 (59)                    | 197 (73) <sup>a</sup>    |
| PCR, mg/mmol                              | 10 [0-18]                 | 0 [0-9]                  | 13 [7-19]                   | 9 [0-17]                 |

<sup>∞</sup>: SBP >140 mmHg and/or DBP >90 mmHg

<sup>a</sup>: P<0.05 vs “present” group

<sup>b</sup>: P<0.001 vs “present” group

Data are presented as mean (standard deviation) for normally distributed variables and as median [first quartile – third quartile] for non-normally distributed variables.

Donors were classified as high-risk if one or more of the following CKD risk factors were present: SBP>140mmHG and/or use of antihypertensive medication (n=165), eGFR <age-adapted threshold (18) (n=10), PCR>15 mg/mmol (n=100), HbA1c>7% (n=7) or BMI>30 (n=99).

N no risk factors=395; N one risk factor=237; N 2 risk factors=62; N 3 risk factors=7

Abbreviations: BMI: body mass index; BSA: body surface area; SBP: systolic blood pressure; DBP: diastolic blood pressure; eGFR: estimated glomerular filtration rate; PCR: protein/creatinine-ratio.

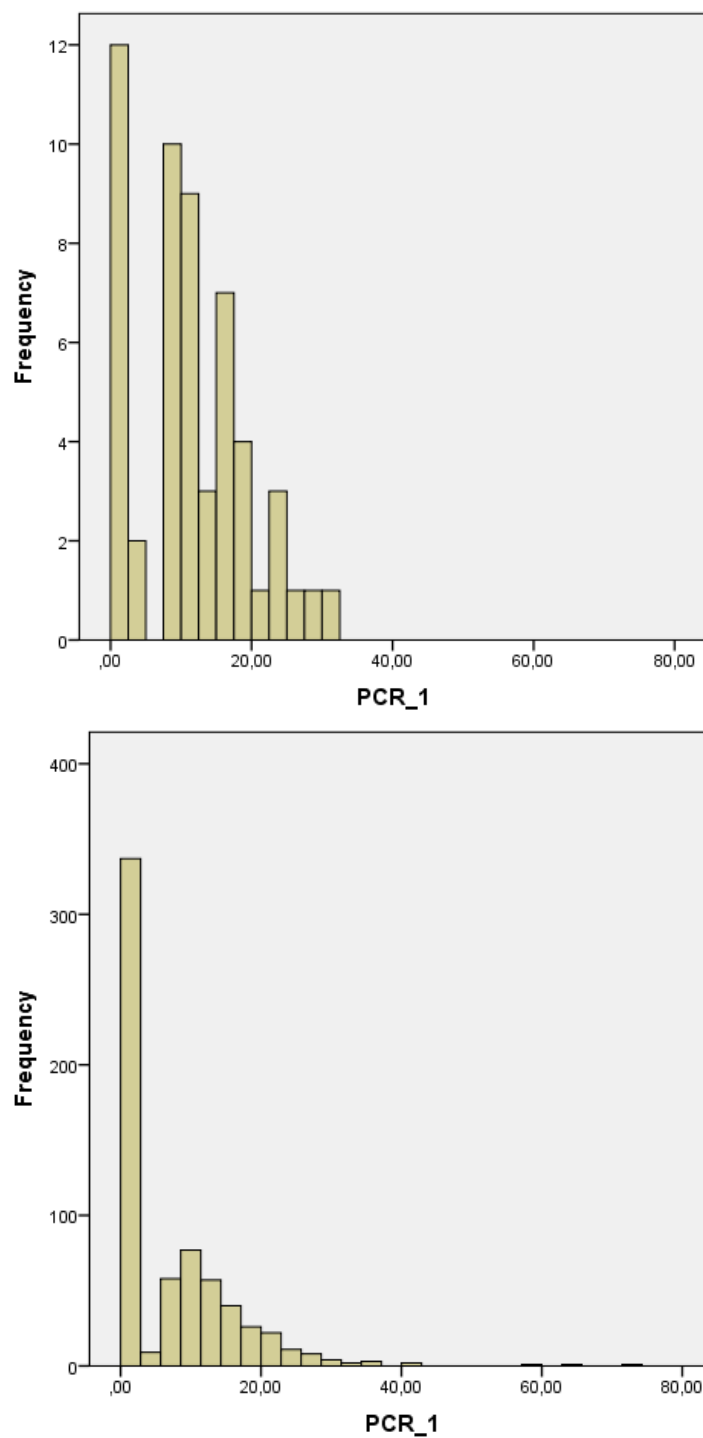

**Figure S1. Distribution of pre-donation PCR in the hematuria group and the non-hematuria group.** Upper figure: hematuria group, PCR in mg/mmol. Lower figure: non-hematuria group, PCR in mg/mmol.

## Supplementary results

### *Latent class growth analysis*

For eGFR and SBP, the best fitting model from the latent class growth analyses was the one with two classes and individual random intercepts and linear slopes (Figures x and y). No clear difference is seen in eGFR decline over time between the two eGFR classes. Also for SBP no worse progression is observed for either class. The best fitting model for PCR was the one with four classes and no individual random effects (Figure z). For the 88 individuals in class 1 PCR increases exponentially after five years after donation, while in the other classes it continues to gradually decrease.

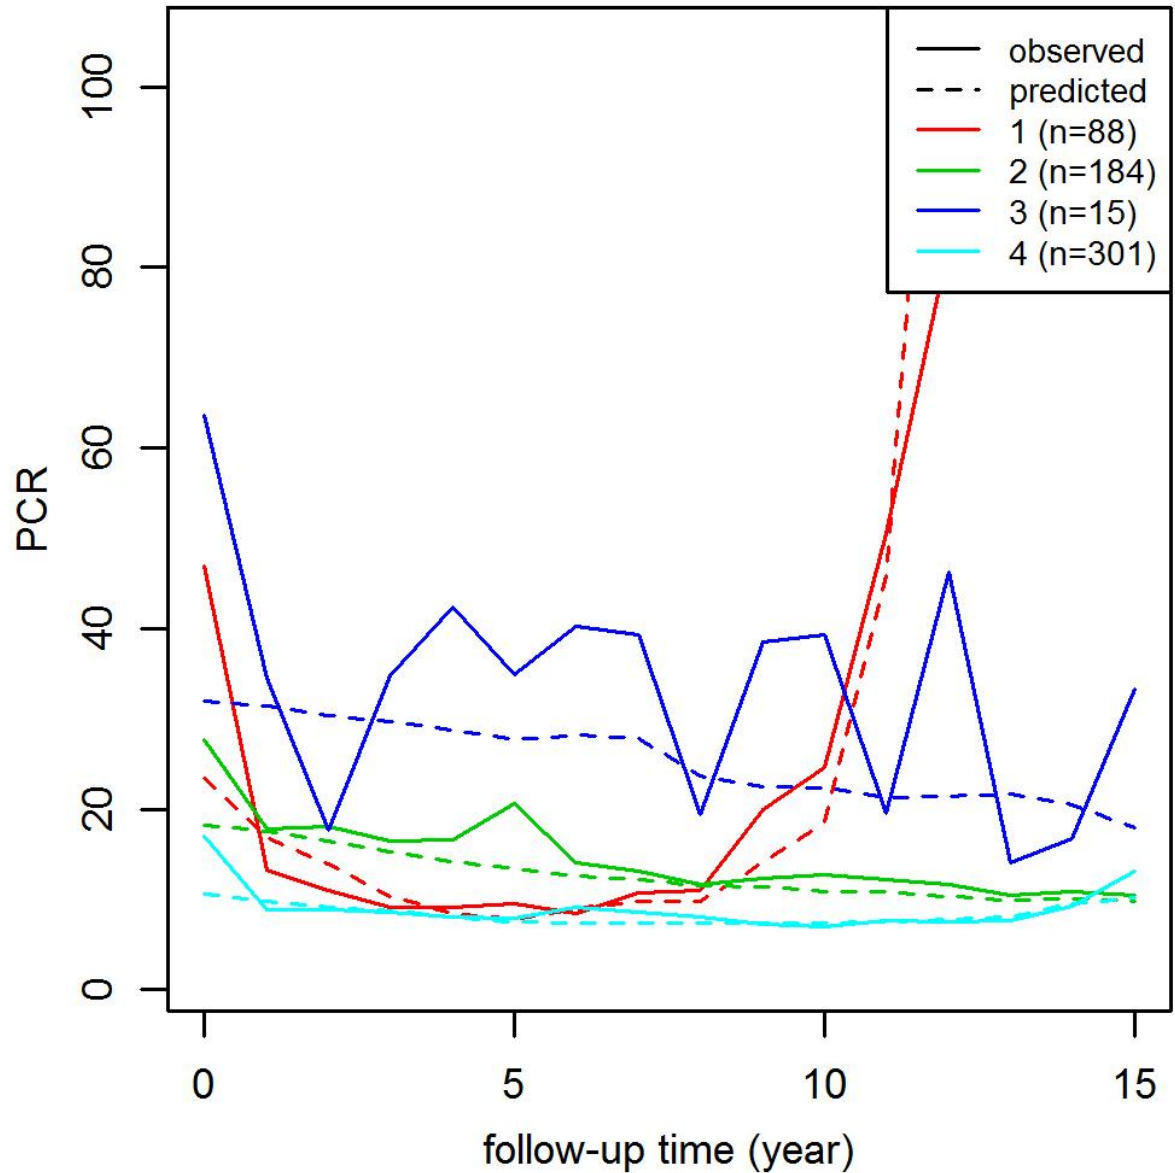

**Figure S2. Latent class growth model of post-donation PCR course.** The best fitting model was with four classes of post-donation PCR course. We defined group 1 (red) and 3 (dark blue) as “worse” progressors (=1 in logistic regression analysis) and group 2 (green) and 4 (turquoise) as the group with better post-donation outcomes (=0 in logistic regression analysis).

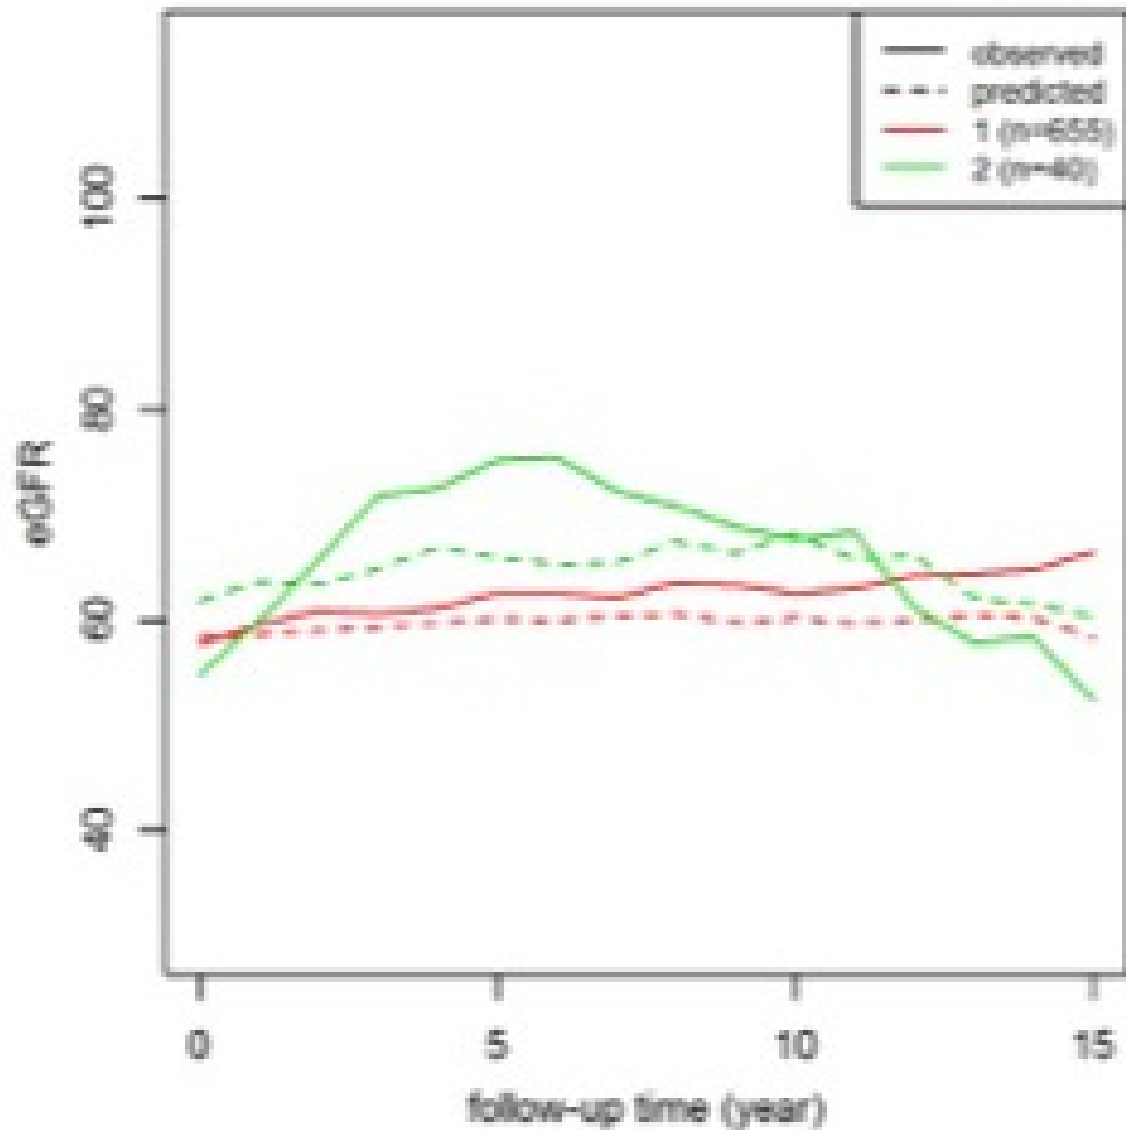

**Figure S3. Latent class growth model of post-donation eGFR course.** The best fitting model was with two classes of post-donation eGFR course. We defined group 2 (green) as the “worse” progressors (=1 in logistic regression analysis) compared to group 1 (red, =0 in logistic regression analysis).

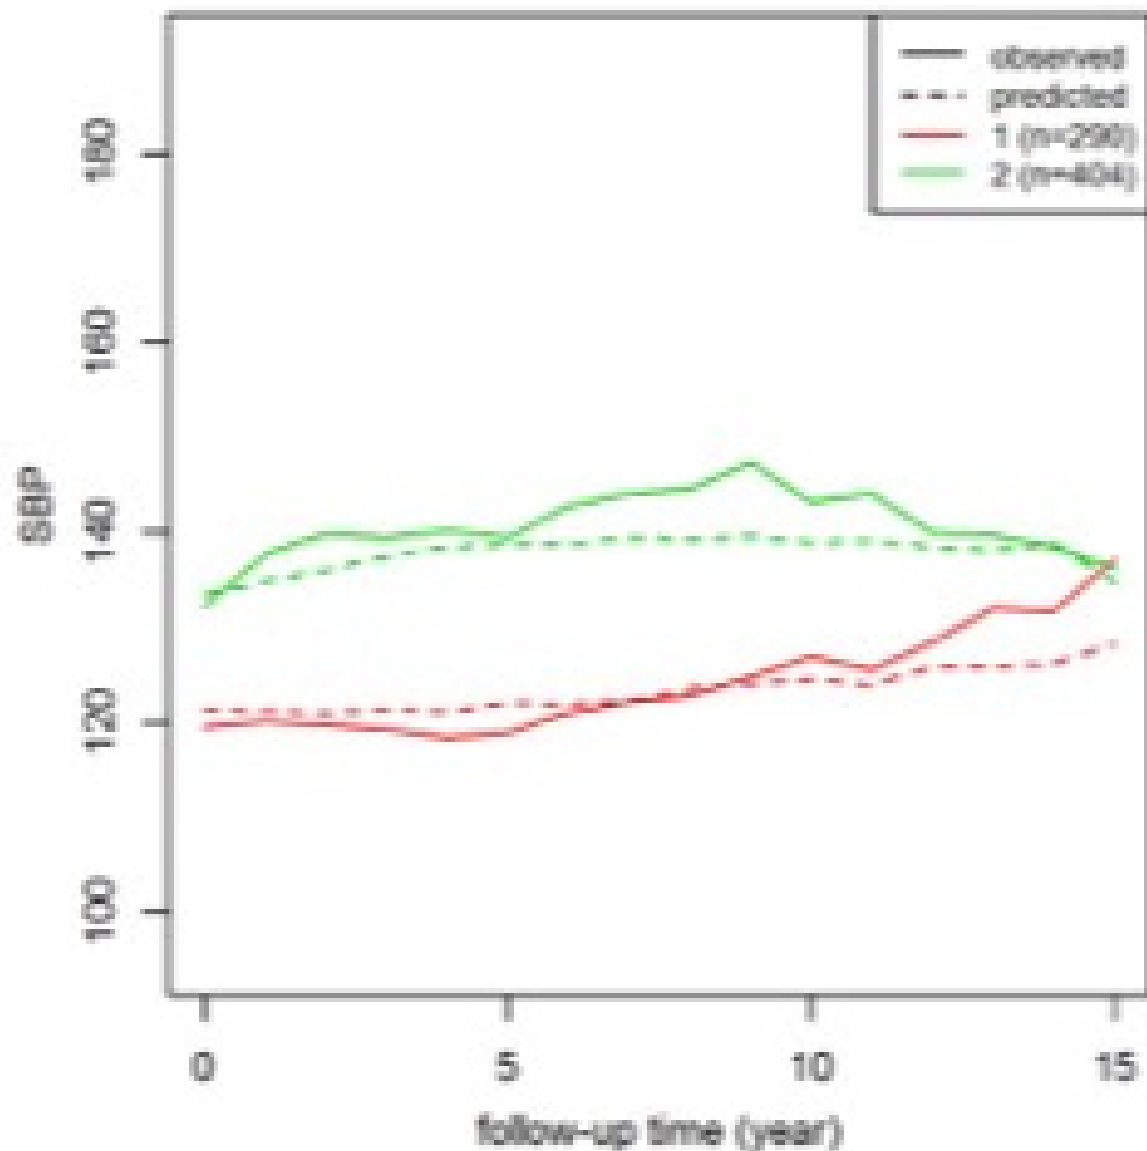

**Figure S4. Latent class growth model of post-donation SBP course.** The best fitting model was with two classes of post-donation SBP course. Whereas group 2 (green) had a higher post-donation SBP course, the course remained relatively stable. Group 1 (red) showed an increase over time and therefore we defined this group as “worse” progressors (=1 in logistic regression analysis).
